# Supplementary material for: [Ni(R2pipdt)2](BF4)2 (R2pipdt = 1,4-disubstituted-piperazine-3,2-dithione) as useful precursors of mixed-ligand dithiolenes of interest for non-linear optics.
Source: Royal Society of Chemistry journal article supplement (doi:10.1039/b106064n), 2001-10-17
Supplement: b106064n.doc [file b106064n.doc]

Supplementary Material 

Communication Ref.: B106064N (Web Password: 904351)
Title : [Ni(R2pipdt)2](BF4)2 (R2pipdt=1,4-disubstituted-piperazine-3,2-dithione) as useful precursors of mixed-ligand dithiolenes of interest for non-linear optics


Experimental

[Ni(Me2pipdt)2](BF4)2 (1') NiCl2·6H2O (790 mg) dissolved in EtOH and Me2pipdt (prepared according to R. Isaksson, T.Liljefors and J. Sandstrm, J. Chem. Research (S), 1981, 43)
 (1.16 g) dissolved in THF (200 mL) were reacted at room temperature. The solution turned from green-brown to blue-red. THF was evaporated and a stoichiometric amount of NaBF4 in EtOH was added to the solution. The solution was then evaporated to dryness and on recrystallization from CH3CN/Et2O well-shaped crystals, whose analytical results are in accordance with [Ni(Me2pipdt)2](BF4)2 have been isolated. IR [cm-1, KBr and polyethylene (below 400 cm-1) pellets]. 2978vw; 1564vs; 1431vw; 1410sh; 1398m; 1382m; 1369vs; 1293s; 1263s; 1207w; 1148vs; 1033vs; 891w; 675w; 665vw; 541s; 522m; 476m; 434m; 402s; 382sh; 305w; 285w; 268w; 235m; 180w; 96m; 70m. Raman (cm-1) 3012w; 2928w; 1578vs; 1419m; 1374s; 1299w; 1278s; 1152m; 546m; 381w; 330w; 156w; 97m. UV-vis (in CH3CN) l/nm (/dm-3mol-1cm-1): 294 (7300); 540 (3900); 605 (4000).
Starting from Pri2pipdt [Ni(Pri2pipdt)2](BF4)2 (1'') has been similarly obtained. IR [cm-1, KBr pellets] 2977m; 2940m; 2880w; 1535vs; 1505sh; 1460m; 1435w; 1367vs; 1345w; 1285s; 1239s; 1183s; 1116vs; 1082vs; 1065vs; 1040vs; 1025sh; 920vw; 900m; 880vw; 817vw; 725w; 600m; 588s; 535w; 522m; 478w.
Preparation of complexes 3: In a typical reaction a CH3CN solution of the complex 1 is reacted with a CH3CN solution of the salt of the dianionic dithiolenes in equimolecular ratios at room temperature. The solution evaporated to dryness gives in almost quantitative yields the products listed below. On recrystallization from CH3CN/Et2O well shaped crystals are obtained. 3b, insoluble in the reaction medium, was obtained as precipitate from the reaction mixture, while 3d was recrystallized from DMF (hot/cool). 
[Ni(Me2pipdt)(mnt)] (3a') . IR [cm-1, KBr  pellets]. 2920vw; 2965vw; 2204m; 2180s; 1550sh; 1535vs; 1487w; 1465s; 1440vw; 1403m; 1383m; 1358vs; 1292m; 1265m; 1205w; 1152s; 1143s; 1103m; ; 1084w; 1035w; 1020vw; 866vw; 814w; 664w; 552m; 514m; 454w. Raman (cm-1) 2215m; 1547s; 1492s; 1446m; 1404m; 1358vs; 1271vs; 1142vs; 1057w; 1039w; 872w; 548w; 523w; 428w; 355w; 137w. UV-vis (in CH3CN) l/nm (/dm-3mol-1cm-1): 294 (7200); 411 (2400); 652 (3800); 733 (4100).
[Ni(Me2pipdt)(dmit)] (3b'). IR [cm-1, KBr pellets] 1530vs; 1426w; 1392s; 1385m; 1353vs; 1285w; 1261s; 1210w; 1145vw; 1100vw; 1063vs; 1024m; 920w; 887w; 820w; 773w; 665w; 515w; 476w; 394w; 348m. Raman (cm-1, in form of powder in KBr) 2205m; 1547s; 1492s; 1446m; 1402m; 1358vs; 1271vs; 1143vs; 1057w; 873w; 524w; 358w; 338w; 137w. UV-vis (in DMF): l/nm (/dm-3mol-1cm-1): 280 (13600); 303 (13300); 340 (12400); 488 (7200); sh 744; 821 (6900). 
[Ni(Pri2pipdt)(dmit)]. IR [cm-1, KBr pellets] 2966vw; 1492vs; 1465m; 1434m; 1384w; 1367m; 1350vs; 1285vw; 1252w; 1227m; 1189m; 1170w; 1127m; 1107m; 1082m; 1046s; 1026s; 967w; 924vw; 897vw; 773vw; 730vw; 658w; 600vw; 593vw; 515w; 505w; 475m; 438vw. No Raman spectra available, due to decomposition of the sample during measurements.
 UV-vis (in DMF) : l/nm (/dm-3mol-1cm-1): 280 (12700); 306 (12600); 340 (11900); 490 (6600); sh 742; 833(6000). 
[Ni(Me2pipdt)(qxd)] (3c'). IR [cm-1, KBr pellets] 1545sh; 1535vs; 1450w; 1403m; 1383m; 1360vs; 1335w; 1290vw; 1259s; 1250m; 1215vw; 1205vw;1175vs; 1145vw; 1118vs; 1025vw; 759m; 741m; 670w; 600s; 544vw; 426w. Raman (cm-1) 1538s; 1451w; 1403w; 1364vs; 1288m; 1263vs; 1141vs; 873w; 789m; 546m; 430w; 354w; 125vw. UV-vis (in CH3CN) l/nm (/dm-3mol-1cm-1): 401 (5200); sh 591; 722 (5000).
[Ni(Me2pipdt)(tkr)] (3d'). IR [cm-1, KBr pellets] 1703s; 1680s; 1660vs; 1629vs; 1547vs; 1408s; 1384vs; 1365s; 1352s; 1280s; 1265s; 1195m; 1144m; 1090m; 1061m; 1025m; 922m; 896m; 802w; 778w; 674w; 665w; 546m; 479m; 430w. Raman (cm-1) 1723vs; 1709vs; 1635s; 1547s; 1359s; 1288s; 1260s; 1202vs; 1148vs; 1057m; 546s; 338m. UV-vis (in CH3CN) l/nm (/dm-3mol-1cm-1): 304 (6800);383 (3200); 480 (2200); 615 (2500); 710 (2600).
[Ni(Me2pipdt)(dsit)] (3e'). IR [cm-1, KBr pellets] 1530vs; 1393m; 1353vs; 1280vw; 1259m; 1210vw; 1083vw; 1062vs; 1030m; 876vw; 830vw; 720w; 670w; 520m; 429m. Raman (cm-1) 1520m; 1450s; 1391w; 1342vs; 1282m; 1257vs; 1135vs; 870w; 543m; 311w; 268w. UV-vis (in DMF) l/nm (/dm-3mol-1cm-1):  286 (14200); 314 (13500); 339 (13200); 474 (7800); sh 716 ; 811 (7500).
[Ni(Me2pipdt)(tdas)] (3f') IR [cm-1, KBr pellets] 1545sh; 1534vs; 1400m; 1395m; 1385m; 1355vs; 1314m; 1259w; 1250sh; 1240s; 1210w; 1143vw; 1099w; 1025w; 814vw; 785m; 774m; 735vw; 665vw; 545vw; 496m; 349m. Raman (cm-1) 2972w; 1534s; 1446m; 1402m; 1351s; 1317s; 1287s; 1261vs; 1143vs; 873m; 545m; 483m. UV-vis (in CH3CN) l/nm (/dm-3mol-1cm-1): 266 (6500); 302 (8800); sh 621; 729 (4200).
Elemental Analyses: Analyses were performed by means of a Carlo Erba CHNS elemental analyzer model EA1108. 
Spectroscopic measurements: IR Spectra. (4000-300 cm-1) were recorded on IFS55 FT-IR Spectrometer, as KBr and polyethylene (below 400 cm-1) pellets . Raman Spectra (resolution  4cm-1) were recorded on a Bruker RFS100 FTR Spectrometer operating with an excitation frequency of 1064 nm (Nd:YAG laser) and/or carried out at room temperature on a single crystal by use of a Raman microscope (BX 40, Olimpus) spectrometer (ISA xy 800) equipped with a He-Ne (l=632,817, Melles-Criot) laser, available in the Physics Department of Cagliari University. A 180° reflective geometry was adopted. The samples were mounted on a glass microscope slide and the scattering peaks were calibrated against a Si standard (n=520 cm-1). A typical spectrum is collected with a 500 sec time constant at  1 cm-1 resolution and is averaged over 5 scans. No sample decomposition was observed during the experiments.

  UV-Visible measurements. Electronic spectra were recorded with a Cary 5 spectrophotometer.

Sketch  of  [Ni(Pri2timdt)(mnt)] see also ref. 7  ( F. Bigoli,  P. Cassoux, P. Deplano, M. L. Mercuri, M.A. Pellinghelli, G. Pintus, A. Serpe, E. F. Trogu J.Chem. Soc., Dalton Trans, 2000,  4639)


. 
